# Supplementary material for: Product Development Opportunities for Dairy Foods Using Ultra-High Temperature Processing
Source: Royal Society of Chemistry journal article supplement (doi:10.1039/d2dt01645a), 1993-01-01
Supplement: d2dt01645a1.pdf [file d2dt01645a1.pdf]

SUPPORTING INFORMATION FOR:

**Closing the loop in the synthesis of heteroscorpionate-based aluminium helicates. Catalytic studies for cyclic carbonate synthesis.**

*Miguel A. Gaona,<sup>a</sup> Felipe de la Cruz-Martínez,<sup>a</sup> María P. Caballero,<sup>a</sup> Enrique Francés-Poveda,<sup>a</sup> Ana M. Rodríguez,<sup>a</sup> Antonio Rodríguez-Diéguez,<sup>c</sup> Michael North,<sup>d</sup> José A. Castro-Osma,<sup>\*b</sup> Agustín Lara-Sánchez<sup>\*a</sup>*

<sup>a</sup>Universidad de Castilla-La Mancha, Dpto. de Química Inorgánica, Orgánica y Bioquímica, Facultad de Ciencias y Tecnologías Químicas, 13071-Ciudad Real, Spain. E-mail: [Agustin.Lara@uclm.es](mailto:Agustin.Lara@uclm.es).

<sup>b</sup>Universidad de Castilla-La Mancha, Dpto. de Química Inorgánica, Orgánica y Bioquímica, Facultad de Farmacia, 02071-Albacete, Spain. E-mail: [JoseAntonio.Castro@uclm.es](mailto:JoseAntonio.Castro@uclm.es).

<sup>c</sup>Universidad de Granada, Dpto. de Química Inorgánica, Facultad de Ciencias, Avda. de Fuentenueva s/n, 18071-Granada, Spain.

<sup>d</sup>Green Chemistry Centre of Excellence, Department of Chemistry, The University of York, York, YO10 5DD (UK).

## Table of Contents

|                                                                                                                                                              |     |
|--------------------------------------------------------------------------------------------------------------------------------------------------------------|-----|
| <b>Figure S1.</b> Tautomers of acetamide or thioacetamide heteroscorpionate ligands                                                                          | S3  |
| <b>Figure S2.</b> Variable temperature <sup>1</sup> H NMR spectra in the region from 6.0 to 3.5 ppm for compound <b>9</b> in toluene- <i>d</i> <sub>8</sub>  | S4  |
| <b>Figure S3.</b> Variable temperature <sup>1</sup> H NMR spectra in the region from 6.3 to 3.3 ppm for compound <b>27</b> in toluene- <i>d</i> <sub>8</sub> | S5  |
| <b>Table S1.</b> Crystallographic data for complexes <b>17</b> and <b>22</b>                                                                                 | S6  |
| <b>Table S2.</b> Selected bond distances (Å) and angles (°) for complexes <b>17</b> and <b>22</b>                                                            | S7  |
| General procedures for cyclic carbonates synthesis                                                                                                           | S8  |
| <b>Figure S4.</b> NMR Spectra for 1,2-hexylene carbonate <b>29a</b> in CDCl <sub>3</sub>                                                                     | S9  |
| <b>Figure S5.</b> NMR Spectra for propylene carbonate <b>29b</b> in CDCl <sub>3</sub>                                                                        | S10 |
| <b>Figure S6.</b> NMR Spectra for 1,2-decylene carbonate <b>29c</b> in CDCl <sub>3</sub>                                                                     | S11 |
| <b>Figure S7.</b> NMR Spectra for 1,2-dodecylene carbonate <b>29d</b> in CDCl <sub>3</sub>                                                                   | S12 |
| <b>Figure S8.</b> NMR Spectra for glycerol carbonate <b>29e</b> in DMSO- <i>d</i> <sub>6</sub>                                                               | S13 |
| <b>Figure S9.</b> NMR Spectra for 3-chloropropylene carbonate <b>29f</b> in CDCl <sub>3</sub>                                                                | S14 |
| <b>Figure S10.</b> NMR Spectra for 3-phenoxypropylene carbonate <b>29g</b> in CDCl <sub>3</sub>                                                              | S15 |
| <b>Figure S11.</b> NMR Spectra for 3-propargyloxypropylene carbonate <b>29h</b> in CDCl <sub>3</sub>                                                         | S16 |
| <b>Figure S12.</b> NMR Spectra for 3-vinyloxypropylene carbonate <b>29i</b> in CDCl <sub>3</sub>                                                             | S17 |
| <b>Figure S13.</b> NMR Spectra for styrene carbonate <b>29j</b> in CDCl <sub>3</sub>                                                                         | S18 |
| <b>Figure S14.</b> NMR Spectra for 4-chlorostyrene carbonate <b>29k</b> in CDCl <sub>3</sub>                                                                 | S19 |
| <b>Figure S15.</b> NMR Spectra for 4-bromostyrene carbonate <b>29l</b> in CDCl <sub>3</sub>                                                                  | S20 |
| <b>Figure S16.</b> NMR Spectra for <i>cis</i> -cyclohexene carbonate <b>31a</b> in CDCl <sub>3</sub>                                                         | S21 |
| <b>Figure S17.</b> NMR Spectra for <i>cis</i> -cyclopentene carbonate <b>31b</b> in CDCl <sub>3</sub>                                                        | S22 |
| <b>Figure S18.</b> NMR Spectra for <i>trans</i> -1-phenyl-2-methylethylene carbonate <b>31c</b> in CDCl <sub>3</sub>                                         | S23 |
| <b>Figure S19.</b> NMR Spectra for <i>trans</i> -1,2-diphenylethylene carbonate <b>31d</b> in CDCl <sub>3</sub>                                              | S24 |
| <b>References</b>                                                                                                                                            | S25 |

**Figure S1.** Tautomers of acetamide or thioacetamide heteroscorpionate ligands

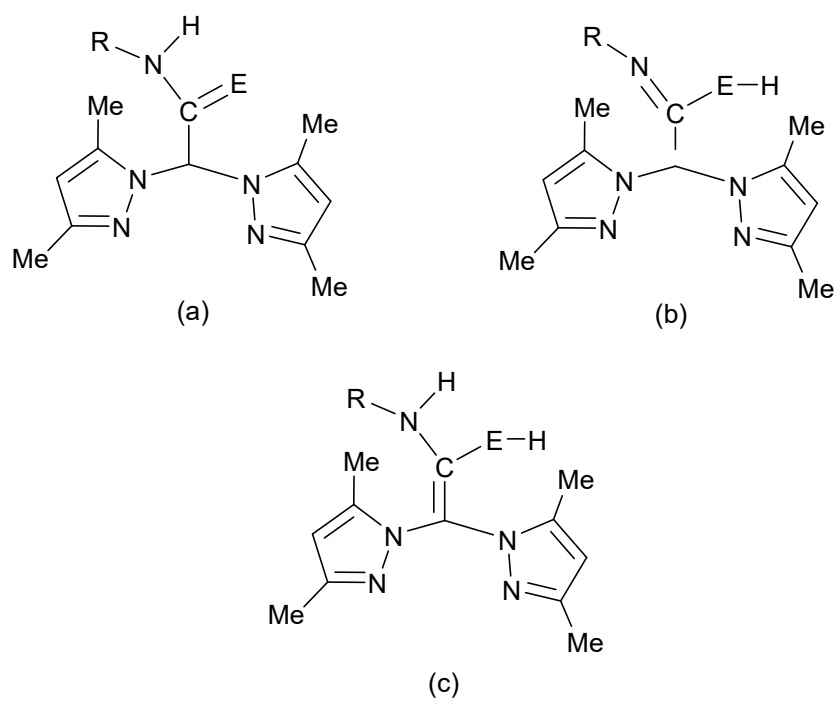

**Figure S2.** Variable temperature  $^1\text{H}$  NMR spectra in the region from 6.0 to 3.5 ppm for compound **9** in toluene- $d_8$

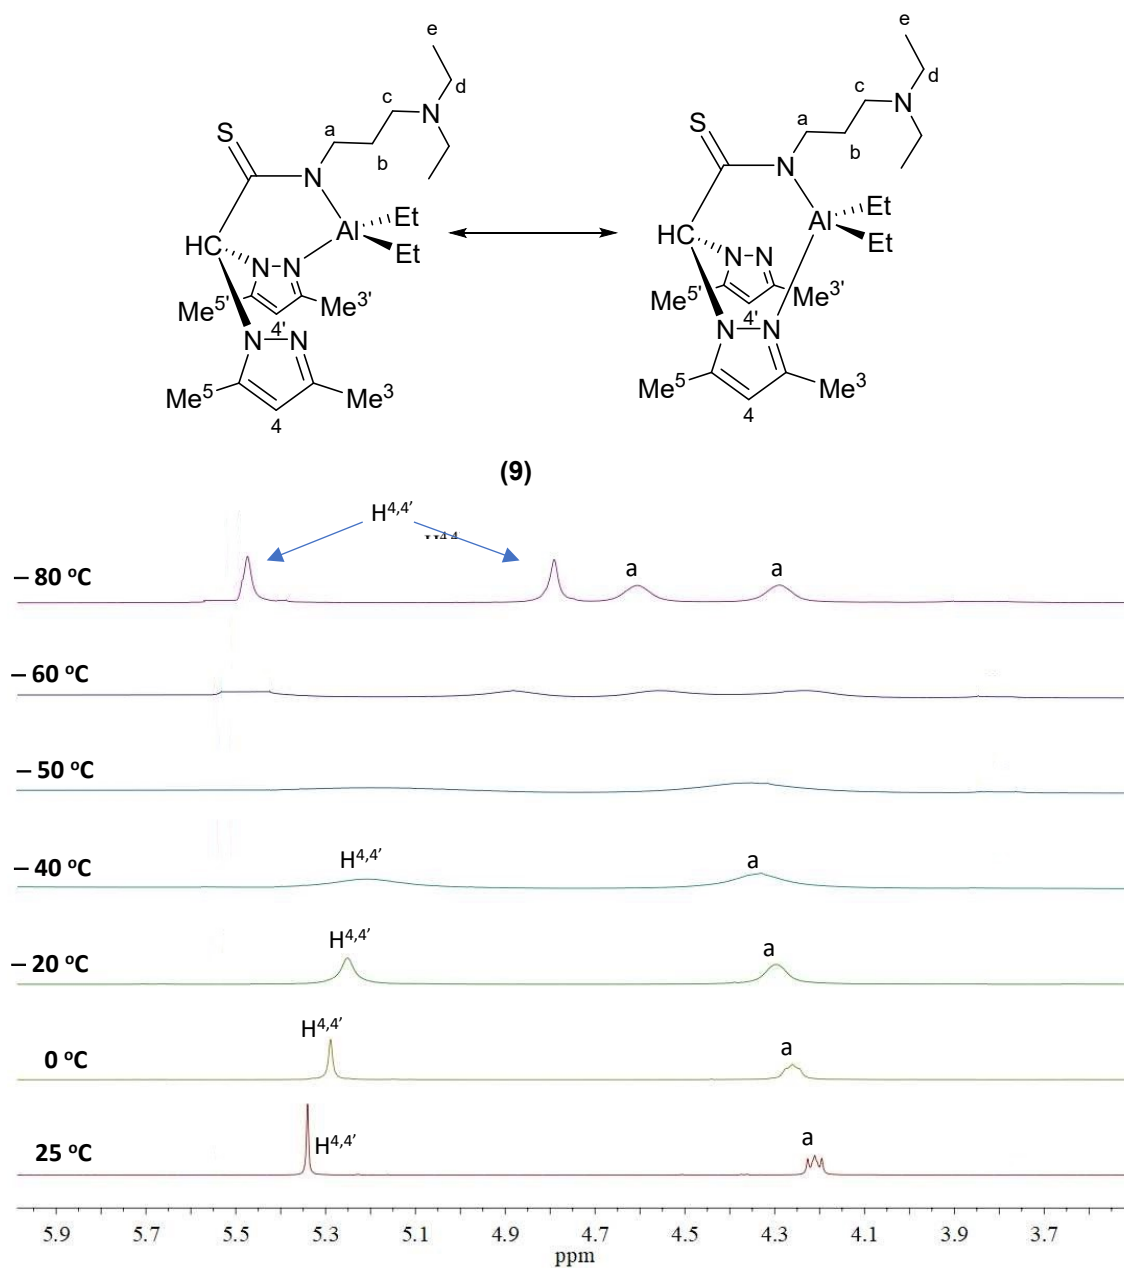

**Figure S3.** Variable temperature  $^1\text{H}$  NMR spectra in the region from 6.3 to 3.3 ppm for compound **27** in toluene- $d_8$

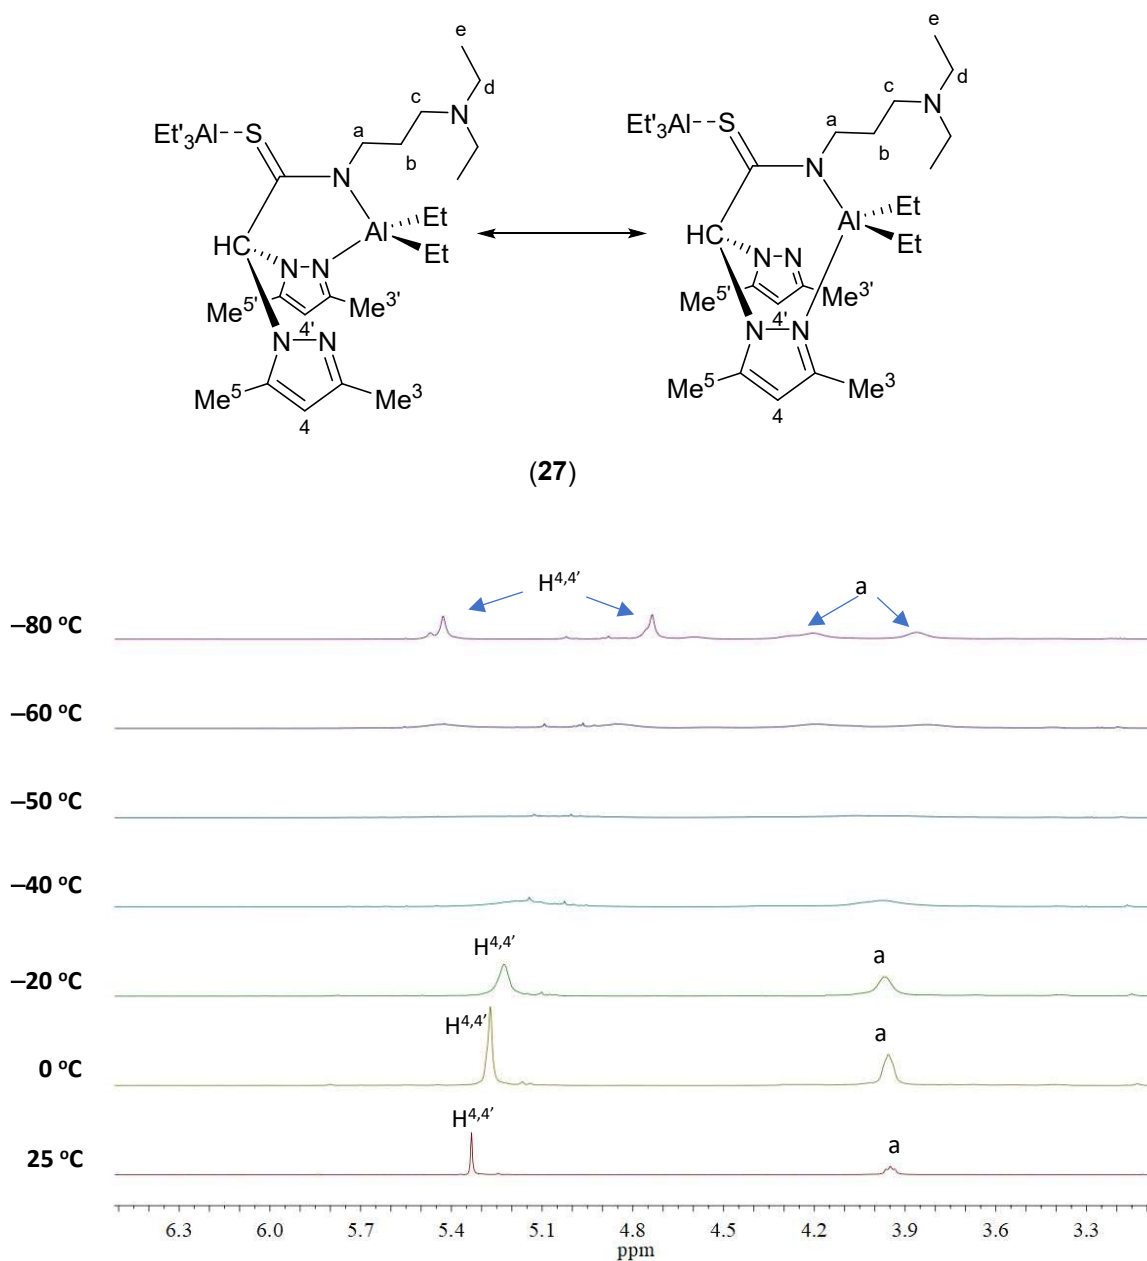

**Table S1.** Crystallographic data for complexes **17** and **22**

|                                              | <b>17</b>                                                        | <b>22</b>                                                        |
|----------------------------------------------|------------------------------------------------------------------|------------------------------------------------------------------|
| Empirical formula                            | C <sub>36</sub> H <sub>64</sub> Al <sub>3</sub> N <sub>5</sub> O | C <sub>27</sub> H <sub>45</sub> Al <sub>2</sub> N <sub>5</sub> O |
| Formula weight                               | 663.86                                                           | 509.64                                                           |
| Temperature (K)                              | 120(2)                                                           | 290(2)                                                           |
| Wavelength (Å)                               | 0.71073                                                          | 0.71073                                                          |
| Crystal system                               | Monoclinic                                                       | Monoclinic                                                       |
| Space group                                  | <i>C c</i>                                                       | <i>P 2<sub>1</sub>/n</i>                                         |
| a(Å)                                         | 20.2041(8)                                                       | 11.7654(13)                                                      |
| b(Å)                                         | 10.0613(7)                                                       | 19.445(2)                                                        |
| c(Å)                                         | 20.8767(11)                                                      | 13.2565(15)                                                      |
| α(°)                                         | 90                                                               | 90                                                               |
| β(°)                                         | 115.022(3)                                                       | 97.2330(10)                                                      |
| γ(°)                                         | 90                                                               | 90                                                               |
| Volume(Å <sup>3</sup> )                      | 3845.5(4)                                                        | 3008.7(6)                                                        |
| Z                                            | 4                                                                | 4                                                                |
| Density (calculated) (g/cm <sup>3</sup> )    | 1.147                                                            | 1.125                                                            |
| Absorption coefficient (mm <sup>-1</sup> )   | 0.132                                                            | 0.123                                                            |
| F(000)                                       | 1448                                                             | 1104                                                             |
| Crystal size (mm <sup>3</sup> )              | 0.17 x 0.17 x 0.12                                               | 0.42 x 0.39 x 0.26                                               |
| Index ranges                                 | -20 ≤ h ≤ 20<br>-10 ≤ k ≤ 10<br>-20 ≤ l ≤ 20                     | -12 ≤ h ≤ 12<br>-20 ≤ k ≤ 17<br>-14 ≤ l ≤ 14                     |
| Reflections collected                        | 9512                                                             | 15843                                                            |
| Independent reflections                      | 3824<br>[R(int) = 0.050]                                         | 3933<br>[R(int) = 0.0333]                                        |
| Data / restraints / parameters               | 3824 / 2 / 417                                                   | 3933 / 0 / 325                                                   |
| Goodness-of-fit on F <sup>2</sup>            | 1.032                                                            | 1.011                                                            |
| Final R indices [ <i>I</i> > 2σ( <i>I</i> )] | R1 = 0.0399<br>wR2 = 0.0932                                      | R1 = 0.0391<br>wR2 = 0.0950                                      |
| Largest diff. peak / hole                    | 0.213 / -0.202                                                   | 0.156 / -0.173                                                   |

**Table S2.** Selected bond distances (Å) and angles (°) for complexes **17** and **22**

| <b>17</b>               |          | <b>22</b>         |          |
|-------------------------|----------|-------------------|----------|
| <i>Bond lengths (Å)</i> |          |                   |          |
| Al(1)-N(5)              | 1.914(5) | Al(1)-N(5)        | 1.943(2) |
| Al(1)-C(13)             | 1.959(7) | Al(1)-N(1)        | 1.951(2) |
| Al(1)-C(15)             | 1.983(7) | Al(2)-O(1)        | 1.877(2) |
| Al(1)-N(1)              | 1.984(5) | N(2)-C(11)        | 1.440(3) |
| Al(2)-O(1)              | 1.868(4) | N(5)-C(12)        | 1.299(3) |
| Al(2)-C(19)             | 1.950(7) | N(5)-C(13)        | 1.515(3) |
| Al(2)-N(4)              | 1.958(5) | O(1)-C(12)        | 1.279(2) |
| Al(2)-C(17)             | 1.960(7) | C(11)-C(12)       | 1.537(3) |
| Al(3)-C(25)             | 1.984(7) |                   |          |
| Al(3)-C(21)             | 1.992(6) |                   |          |
| Al(3)-C(23)             | 1.992(7) |                   |          |
| Al(3)-O(1)              | 1.995(4) |                   |          |
| <i>Angles (°)</i>       |          |                   |          |
| N(5)-Al(1)-C(13)        | 115.4(3) | N(5)-Al(1)-N(1)   | 96.69(8) |
| N(5)-Al(1)-C(15)        | 117.4(3) | N(5)-Al(1)-C(24)  | 119.8(2) |
| C(13)-Al(1)-C(15)       | 113.8(3) | C(24)-Al(1)-N(1)  | 108.7(1) |
| N(5)-Al(1)-N(1)         | 92.8(2)  | N(5)-Al(1)-C(23)  | 107.0(1) |
| C(13)-Al(1)-N(1)        | 103.9(3) | C(24)-Al(1)-C(23) | 118.9(1) |
| O(1)-Al(2)-C(19)        | 111.5(2) | N(1)-Al(1)-C(23)  | 101.9(1) |
| O(1)-Al(2)-N(4)         | 91.8(2)  | O(1)-Al(2)-C(26)  | 104.6(1) |
| C(19)-Al(2)-N(4)        | 113.1(3) | O(1)-Al(2)-C(25)  | 102.2(1) |
| O(1)-Al(2)-C(17)        | 116.6(2) | C(26)-Al(2)-C(25) | 115.4(2) |
| C(19)-Al(2)-C(17)       | 116.3(3) | O(1)-Al(2)-C(27)  | 105.9(1) |
| C(25)-Al(3)-C(21)       | 108.0(3) | C(26)-Al(2)-C(27) | 112.1(1) |
| C(25)-Al(3)-O(1)        | 112.7(2) | C(25)-Al(2)-C(27) | 115.0(1) |
| C(21)-Al(3)-O(1)        | 102.5(2) | O(1)-Al(2)-C(26)  | 104.7(1) |
| C(23)-Al(3)-O(1)        | 104.2(3) | C(12)-N(5)-C(13)  | 118.6(2) |
| C(25)-Al(3)-C(23)       | 112.9(3) | C(12)-N(5)-Al(1)  | 122.6(1) |
|                         |          | C(13)-N(5)-Al(1)  | 117.6(1) |
|                         |          | N(2)-C(11)-N(4)   | 111.7(2) |
|                         |          | N(2)-C(11)-C(12)  | 116.1(2) |
|                         |          | N(4)-C(11)-C(12)  | 108.3(2) |
|                         |          | O(1)-C(12)-N(5)   | 126.1(2) |
|                         |          | O(1)-C(12)-C(11)  | 112.6(2) |
|                         |          | N(5)-C(12)-C(11)  | 120.7(2) |

## General procedures for cyclic carbonates synthesis

### General procedure for synthesis of cyclic carbonates at one bar pressure

An epoxide **28a–l** (1.7 mmol), complex **16** (19.2 mg, 34.0  $\mu\text{mol}$ ) and  $\text{Bu}_4\text{NBr}$  (10.7 mg, 33.0  $\mu\text{mol}$ ) were placed in a sample vial fitted with a magnetic stirrer bar and placed in a large conical flask. Cardice pellets were added to the conical flask which was fitted with a rubber stopper pierced by a deflated balloon. The reaction mixture was stirred for 24 h at 25 °C for epoxides **28a–j** or 50 °C for epoxides **28k,l**. The conversion of epoxide into cyclic carbonate was then determined by analysis of a sample by  $^1\text{H-NMR}$  spectroscopy. The remaining sample was filtered through a plug of silica, eluting with  $\text{CH}_2\text{Cl}_2$  to remove the catalyst. The eluent was evaporated *in vacuo* to give either the pure cyclic carbonate or a mixture of cyclic carbonate and unreacted epoxide. In the latter case, the mixture was purified by flash chromatography using a solvent system of first hexane, then hexane-EtOAc (9:1), then hexane-EtOAc (3:1), then EtOAc to give the pure cyclic carbonate. Cyclic carbonates **29a–l** are all known compounds and the spectroscopic data for samples prepared using complex **16** were consistent with those reported in the literature.<sup>1</sup>

### General procedure for synthesis of cyclic carbonates at 10 bar pressure

An epoxide **30a–d** (1.7 mmol), complex **16** (48.1 mg, 85.0  $\mu\text{mol}$ ) and  $\text{Bu}_4\text{NBr}$  (27.4 mg, 85.0  $\mu\text{mol}$ ) were placed in a stainless-steel pressure reactor with a magnetic stirrer bar. The reactor was pressurised to 10 bar of carbon dioxide and the reaction mixture was stirred at 25–90 °C for 24 h. Then the conversion of epoxide **30a–d** into cyclic carbonate **31a–d** was determined by analysis of a sample by  $^1\text{H-NMR}$  spectroscopy. The remaining sample was filtered through a plug of silica, eluting with  $\text{CH}_2\text{Cl}_2$  to remove the catalyst. The eluent was evaporated *in vacuo* to give a mixture of cyclic carbonate and unreacted epoxide. The mixture was purified by flash chromatography using a solvent system of first hexane, then hexane-EtOAc (9:1), then hexane-EtOAc (3:1), then EtOAc to give the pure cyclic carbonate. Cyclic carbonates **31a–d** are all known compounds and the spectroscopic data for samples prepared using complex **16** were consistent with those reported in the literature.<sup>1</sup>



Figure S4. NMR Spectra for 1,2-hexylene carbonate **29a** in CDCl<sub>3</sub>

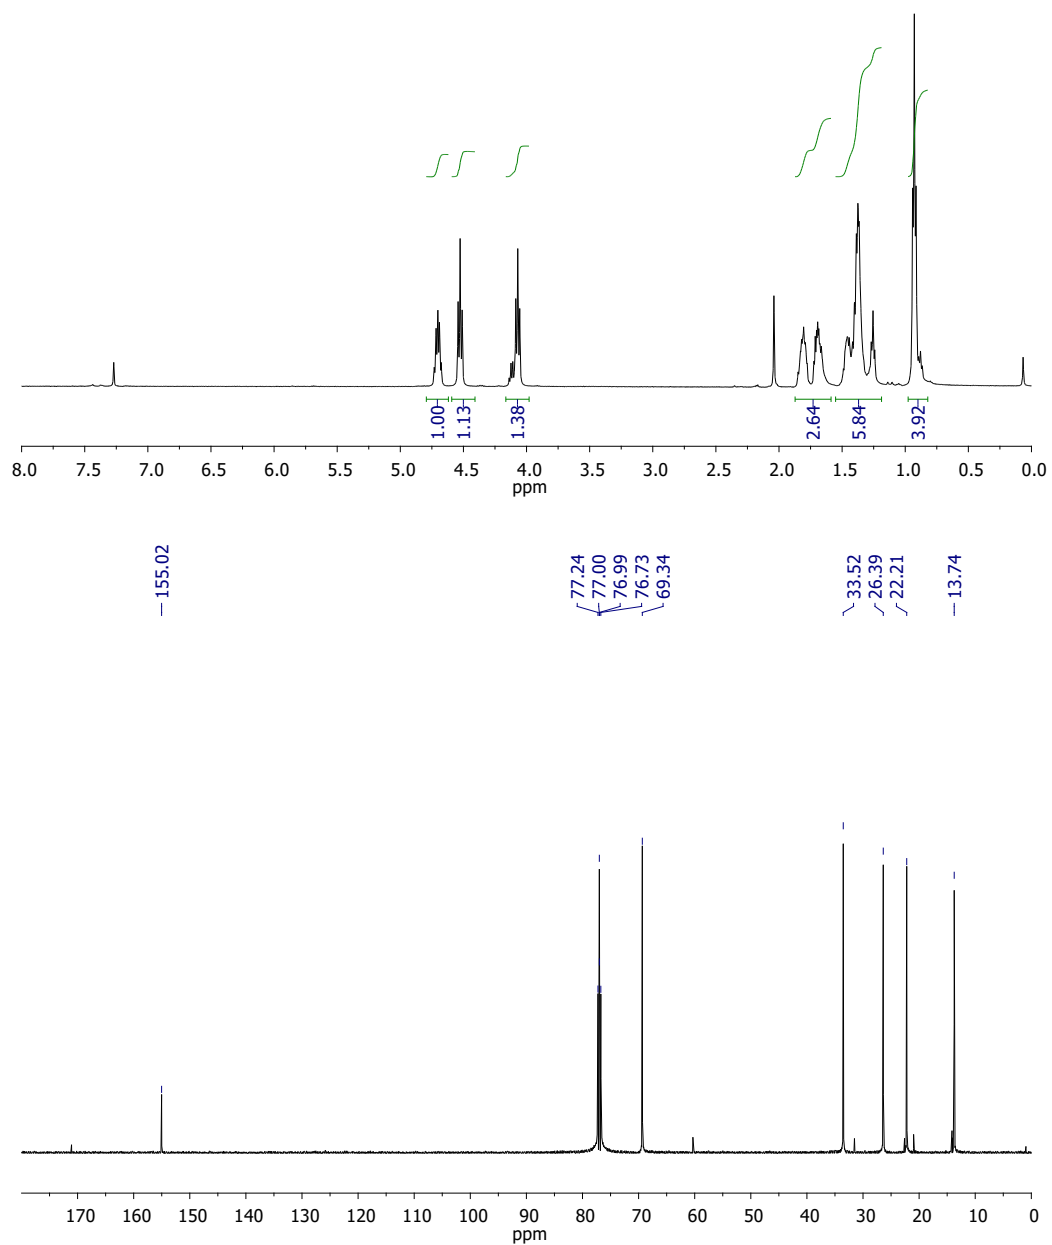

Figure S5. NMR Spectra for propylene carbonate **29b** in CDCl<sub>3</sub>

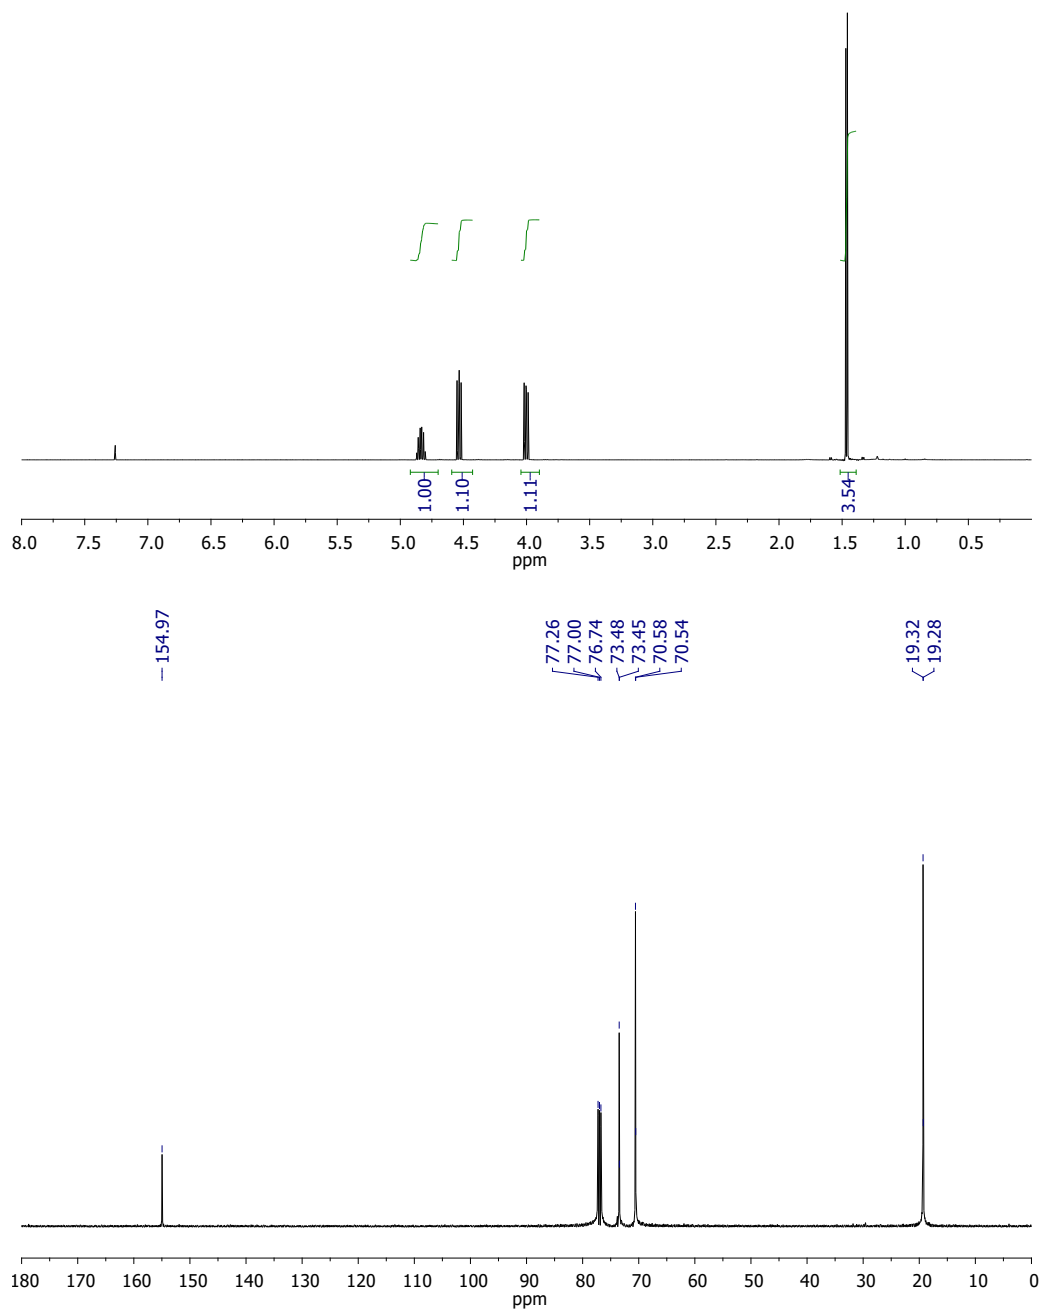

Figure S6. NMR Spectra for 1,2-decylene carbonate **29c** in CDCl<sub>3</sub>

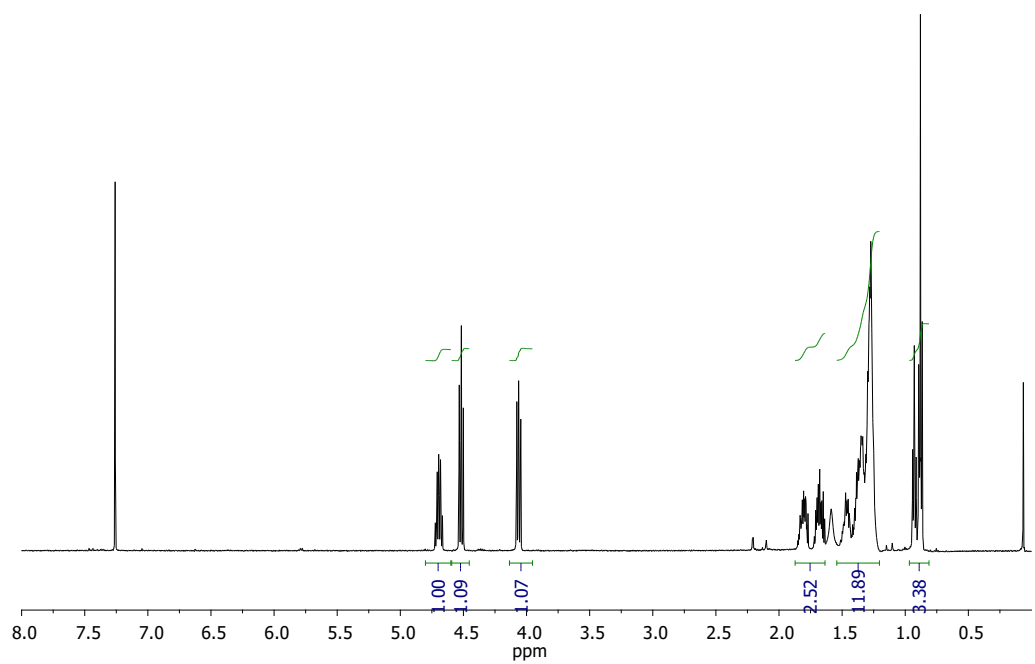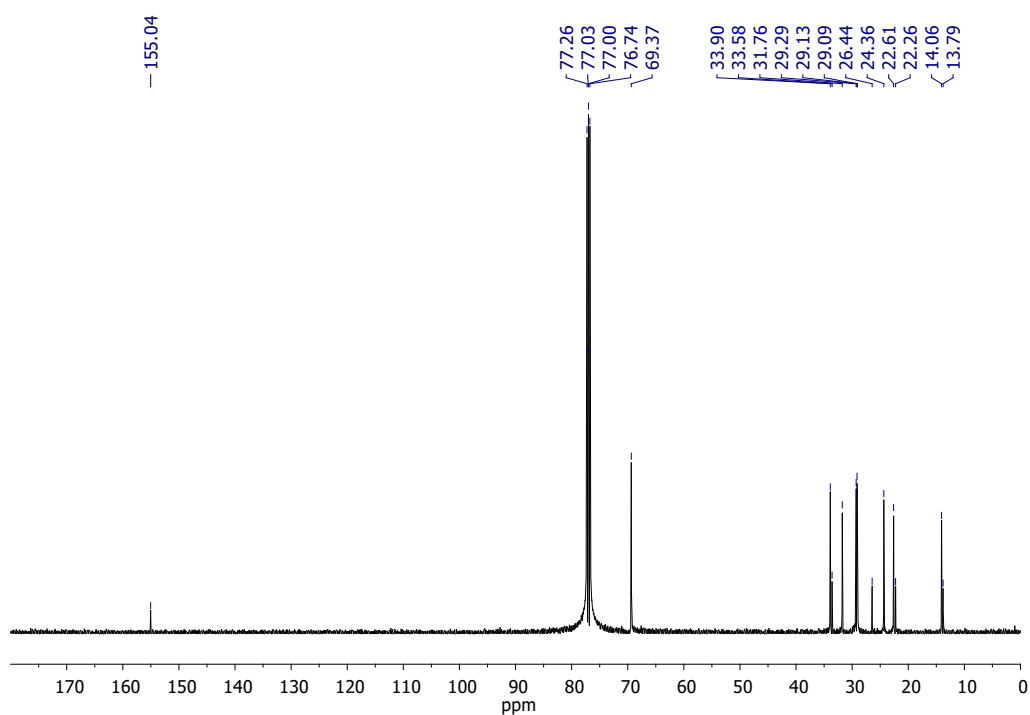

Figure S7. NMR Spectra for 1,2-dodecylene carbonate **29d** in CDCl<sub>3</sub>

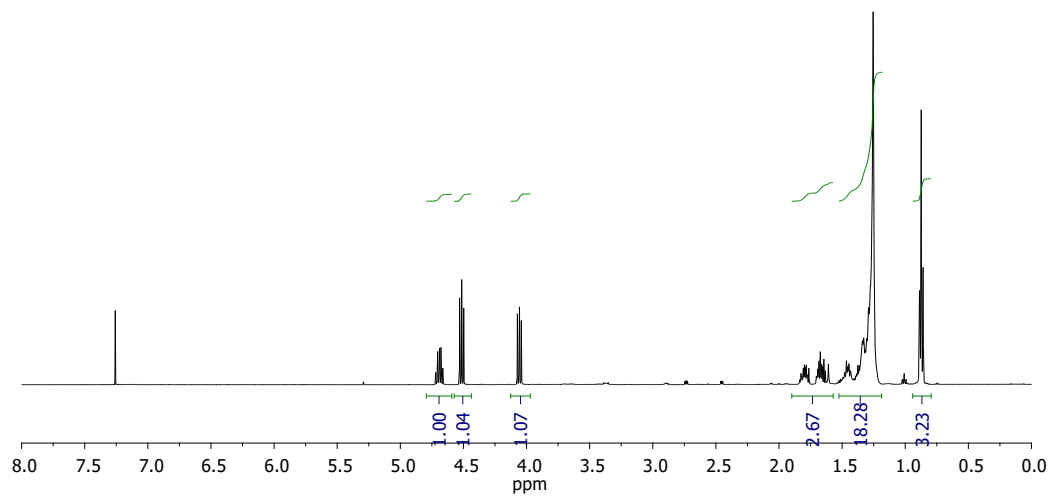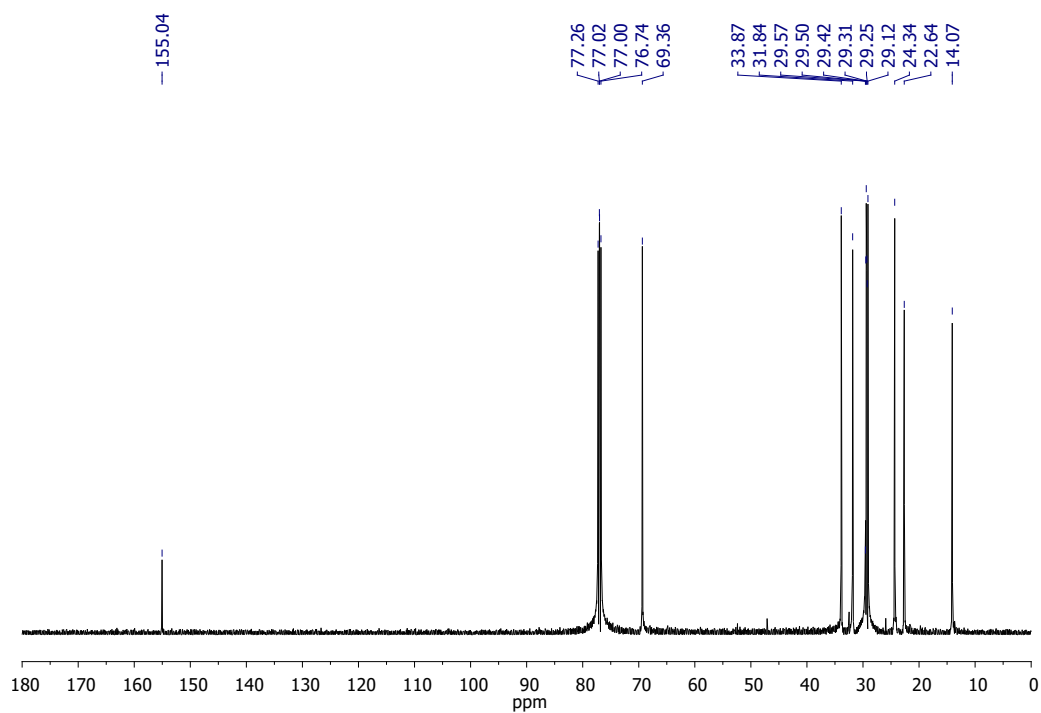

**Figure S8.** NMR Spectra for glycerol carbonate **29e** in DMSO- $d_6$

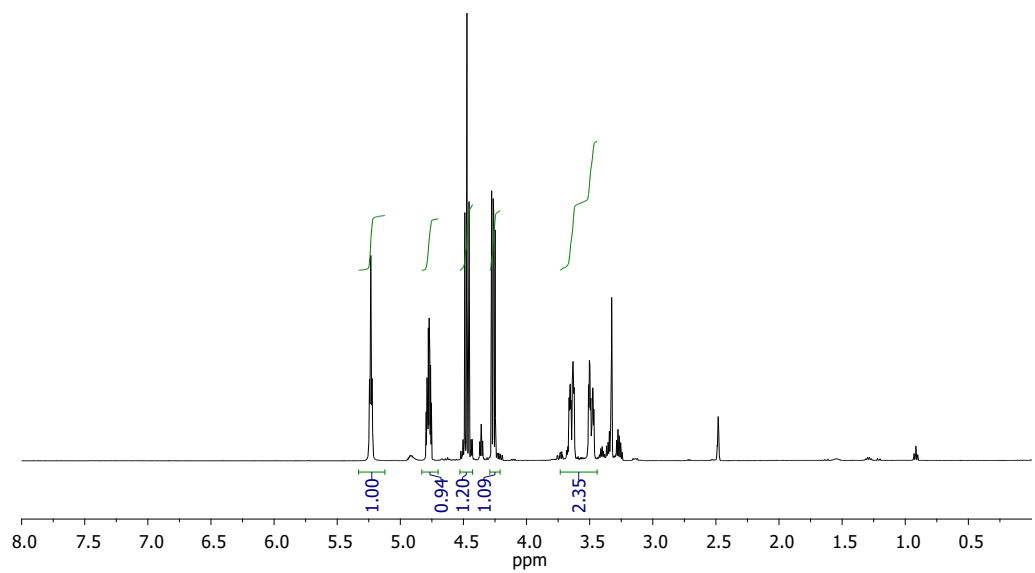

155.19

77.05

65.89

60.62

39.87

39.70

39.53

39.36

39.19

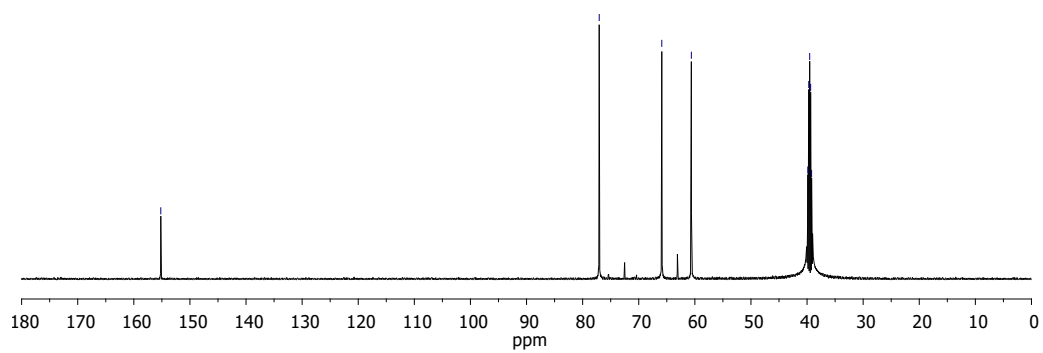

Figure S9. NMR Spectra for 3-chloropropylene carbonate **29f** in CDCl<sub>3</sub>

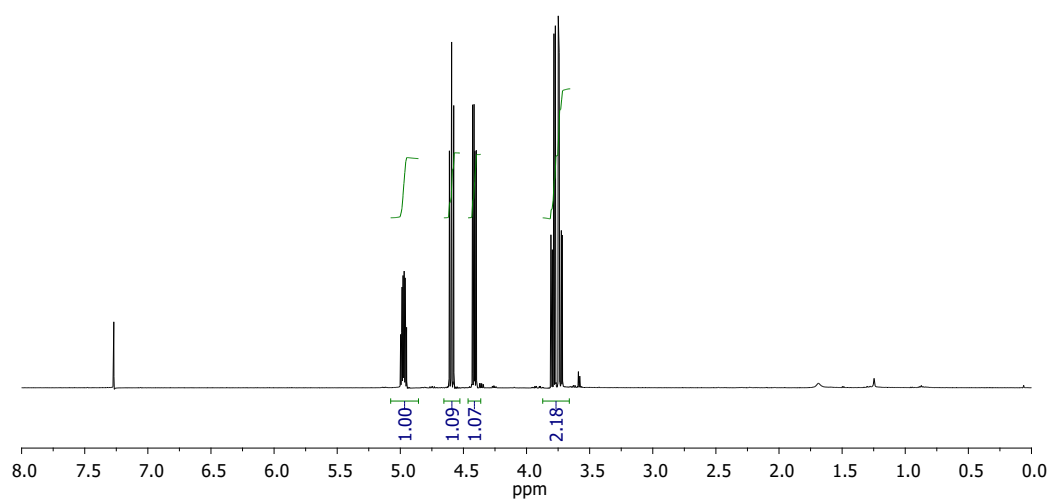

-154.12

77.25  
77.00  
76.74  
74.22  
66.92

-43.62

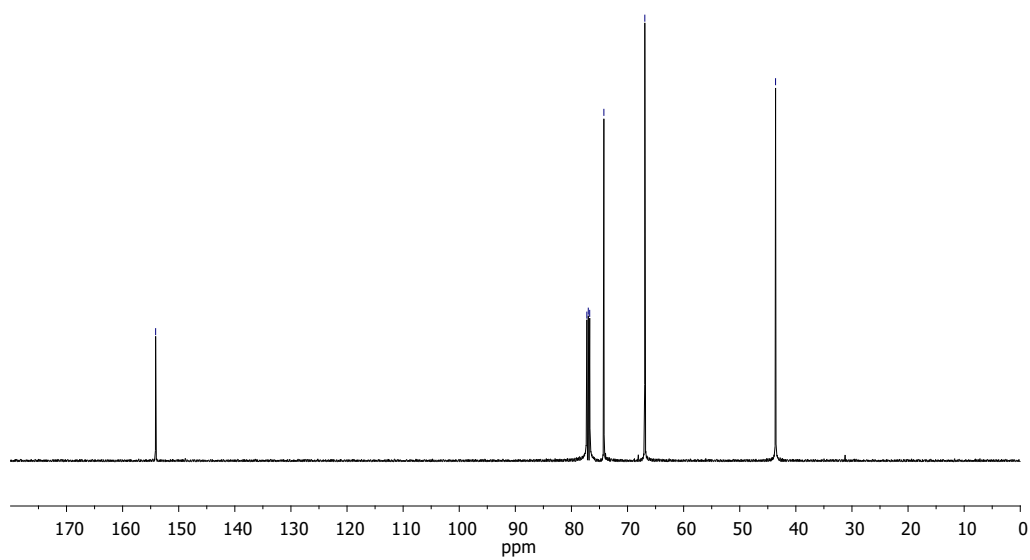

Figure S10. NMR Spectra for 3-phenoxypropylene carbonate **29g** in  $\text{CDCl}_3$

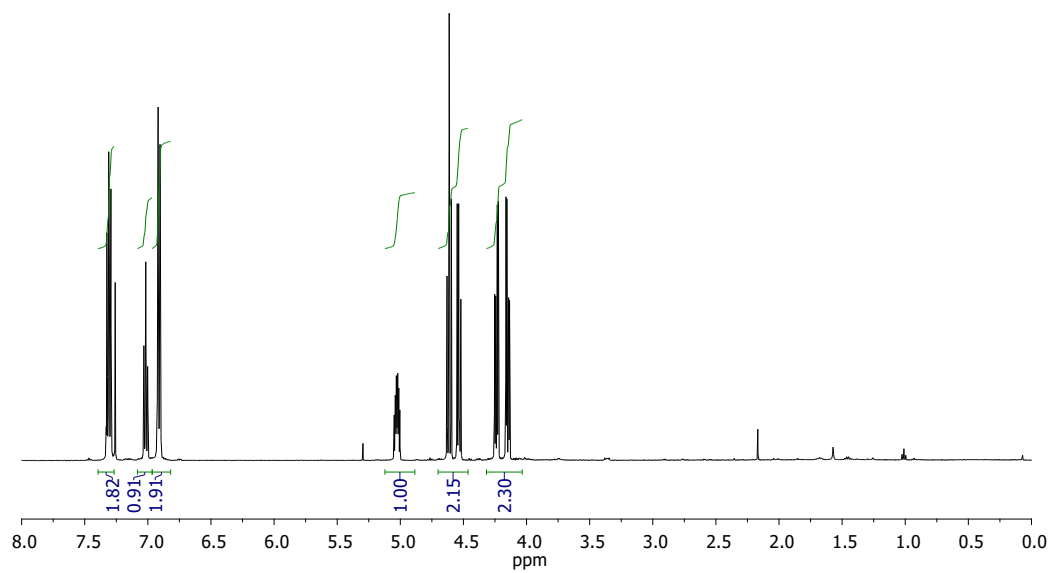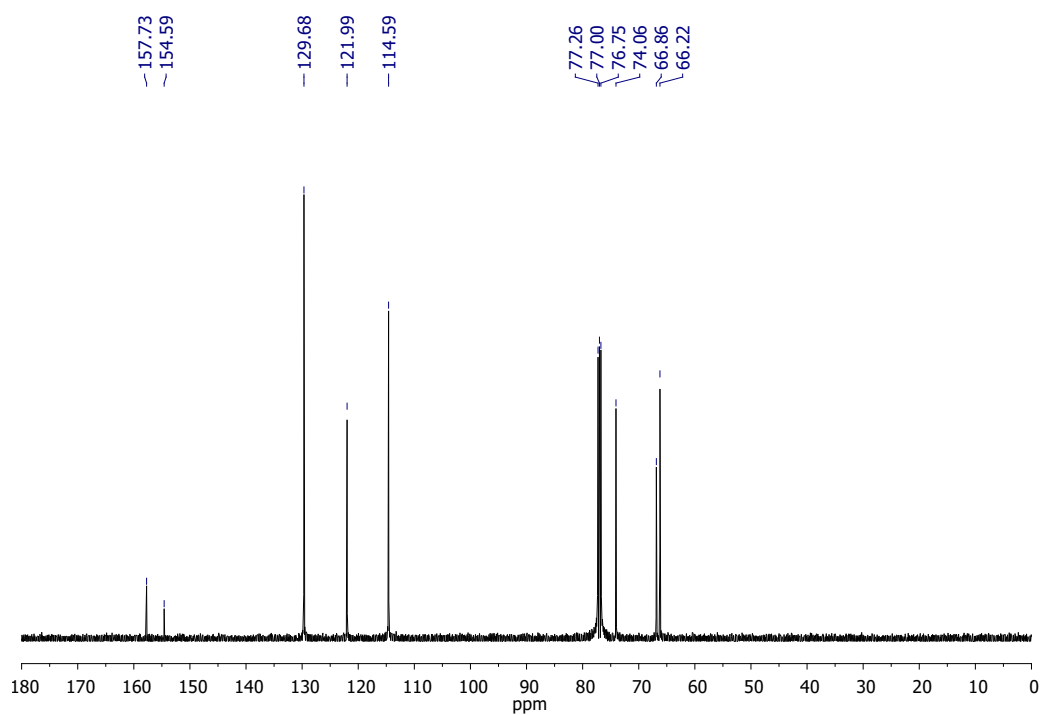

Figure S11. NMR Spectra for 3-propargyloxypropylene carbonate **29h** in CDCl<sub>3</sub>

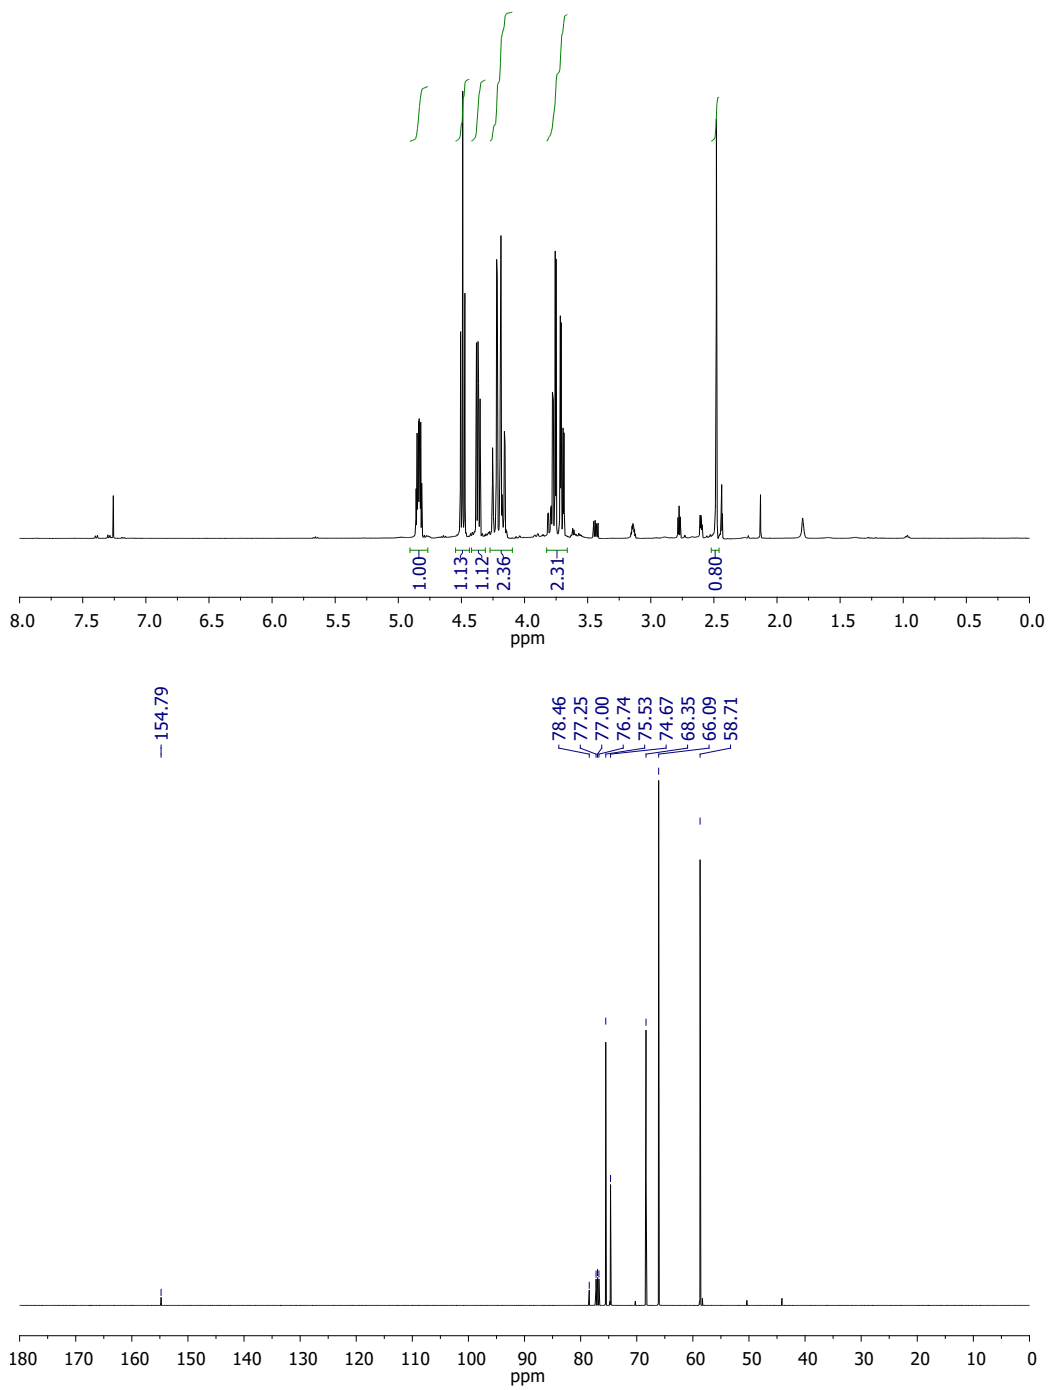



Figure S12. NMR Spectra for 3-vinyloxypropylene carbonate **29i** in CDCl<sub>3</sub>

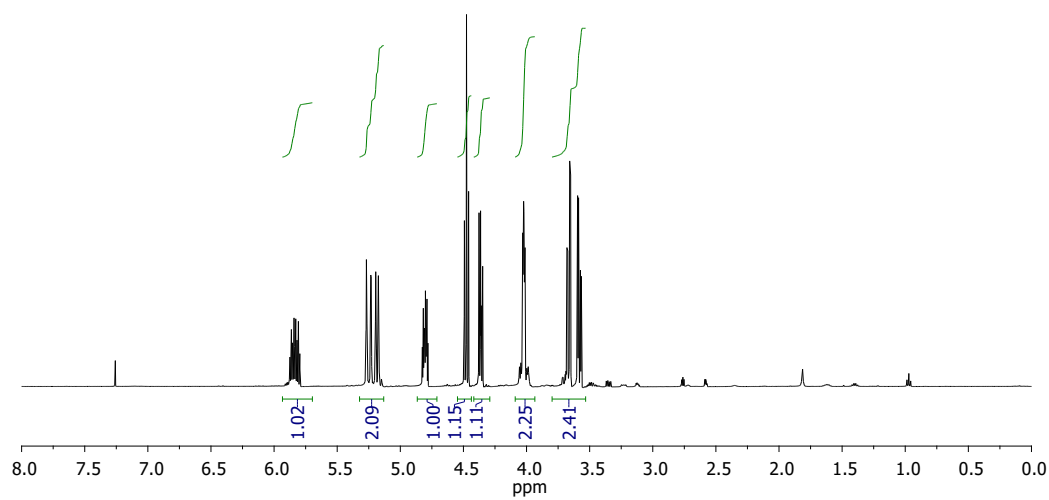

154.89  
133.58  
117.71  
77.26  
77.00  
76.74  
75.01  
72.43  
68.74  
66.16

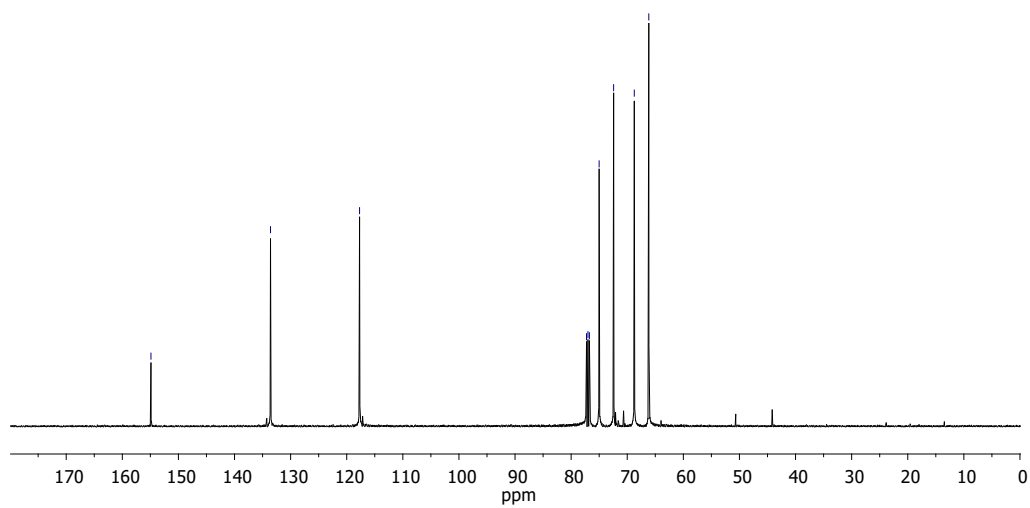

**Figure S13.** NMR Spectra for styrene carbonate **29j** in CDCl<sub>3</sub>

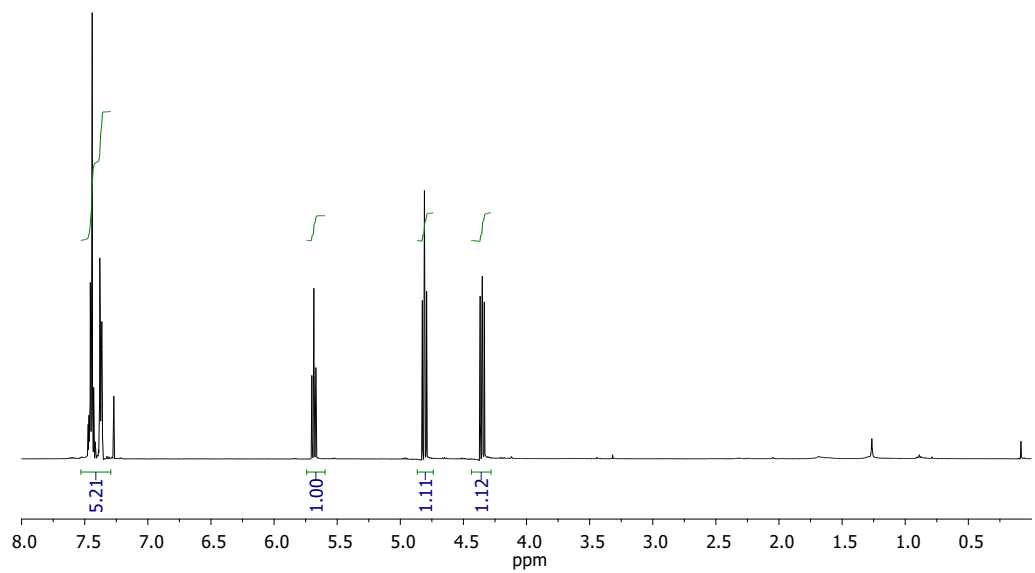

154.77

135.75

129.68

129.18

125.82

77.94

77.25

77.00

76.74

71.11

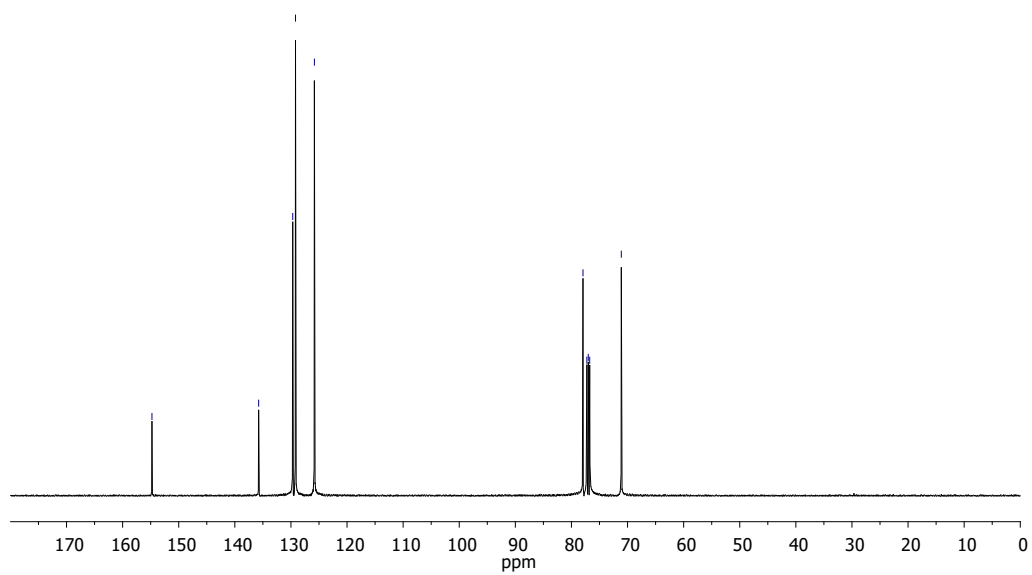

Figure S14. NMR Spectra for 4-chlorostyrene carbonate **29k** in CDCl<sub>3</sub>

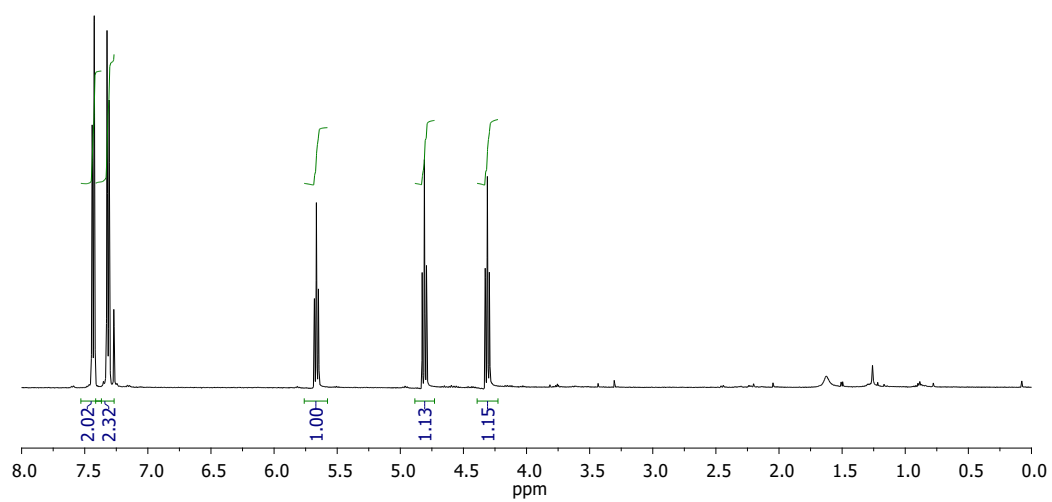

Chemical shift values (ppm) for the <sup>13</sup>C NMR spectrum:

- 154.47
- 135.77
- 134.27
- 129.49
- 127.22
- 127.20
- 77.26
- 77.20
- 77.00
- 76.74
- 70.96

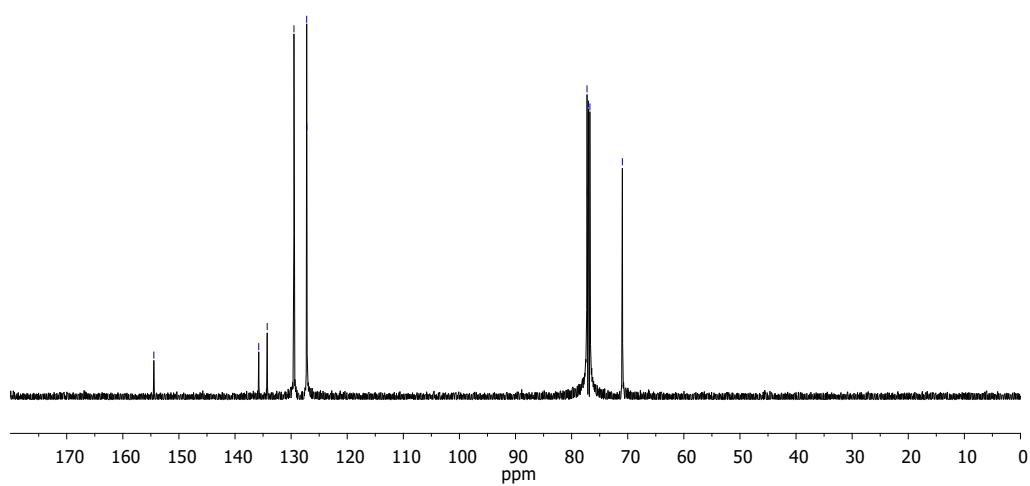

Figure S15. NMR Spectra for 4-bromostyrene carbonate **29I** in CDCl<sub>3</sub>

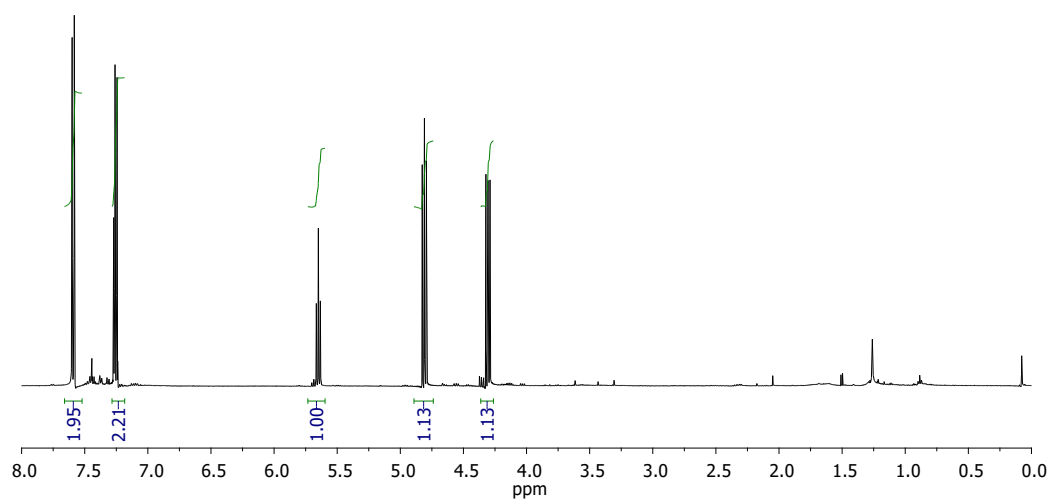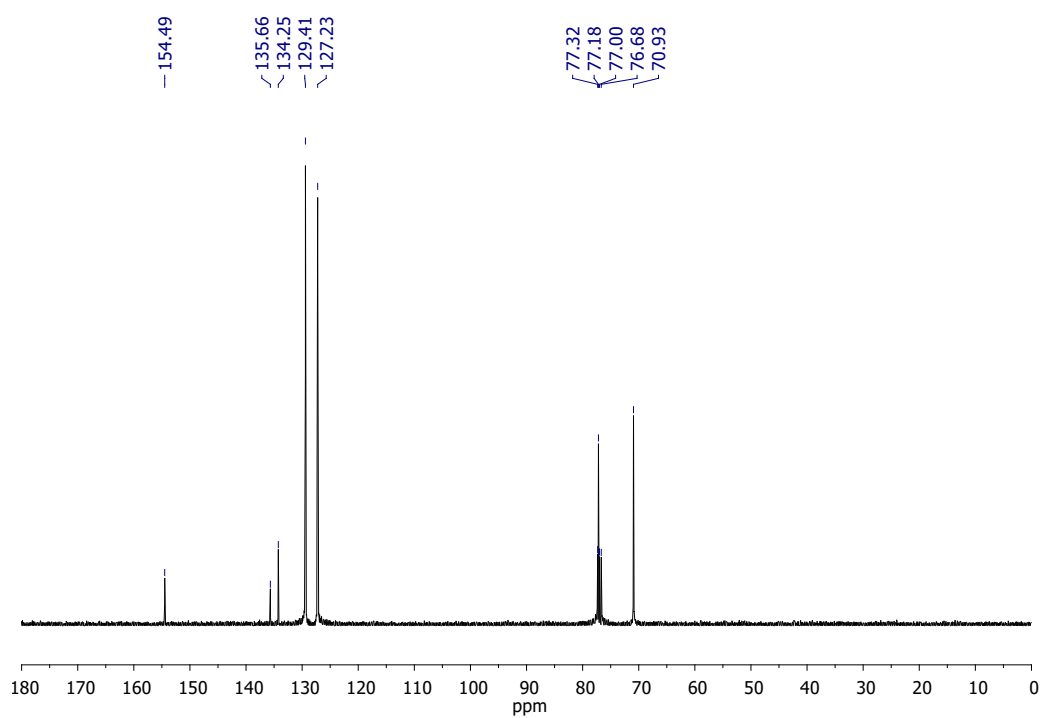

**Figure S16.** NMR Spectra for *cis*-cyclohexene carbonate **31a** in CDCl<sub>3</sub>

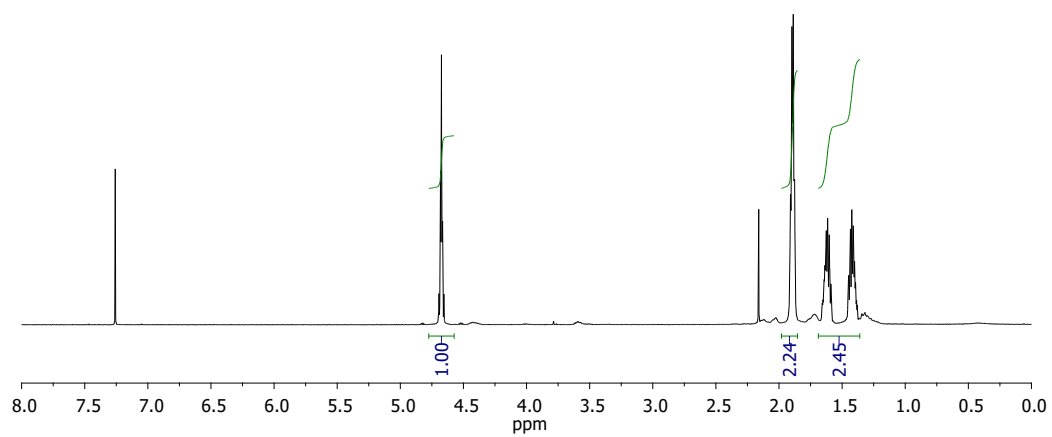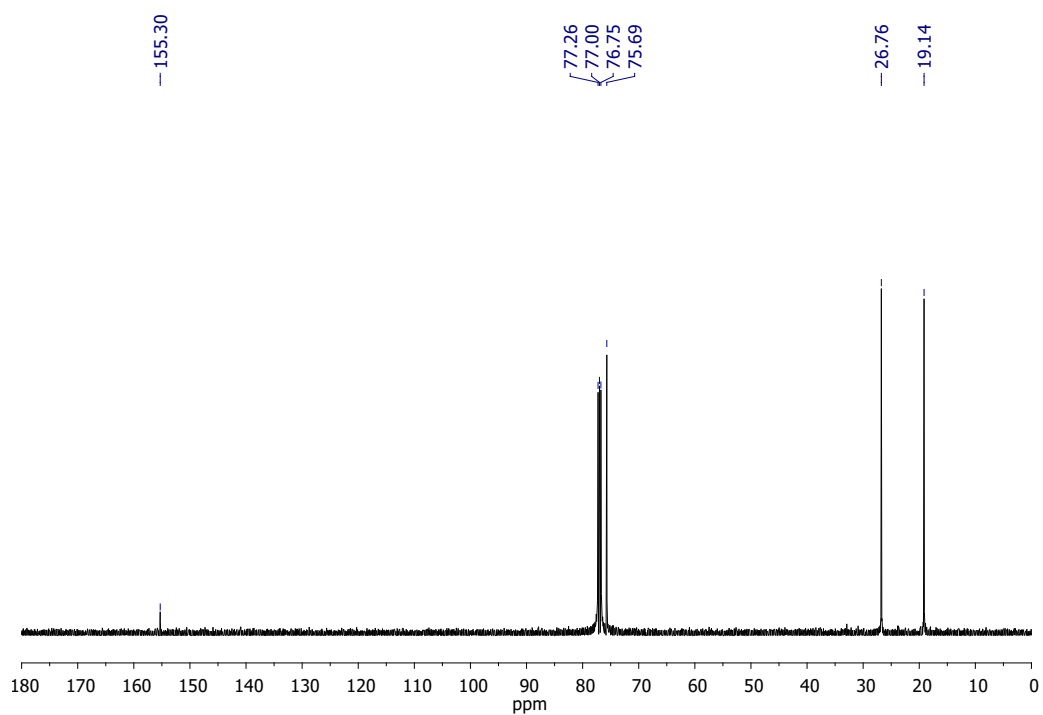

Figure S17. NMR Spectra for *cis*-cyclopentene carbonate **31b** in CDCl<sub>3</sub>

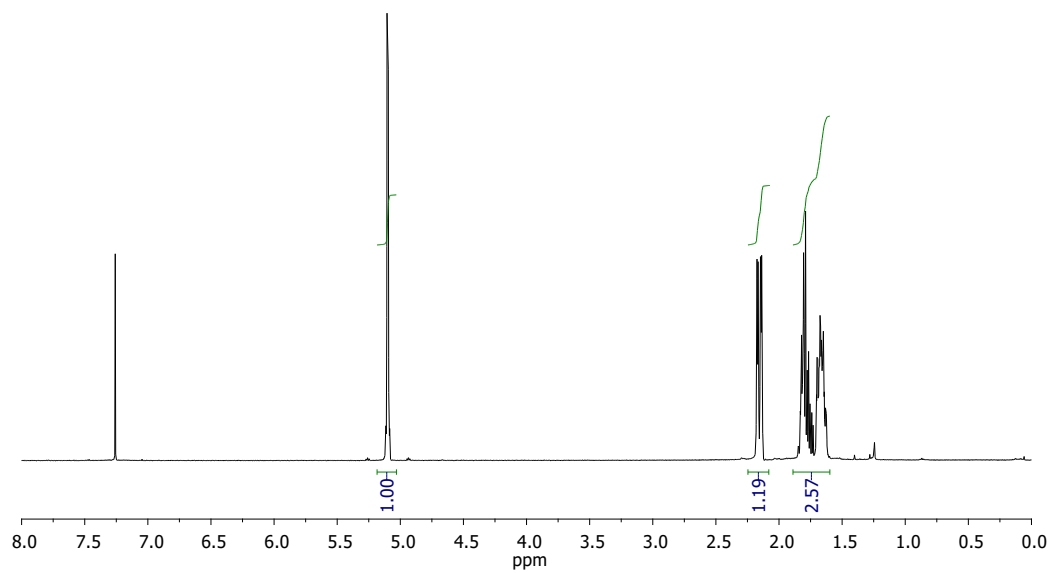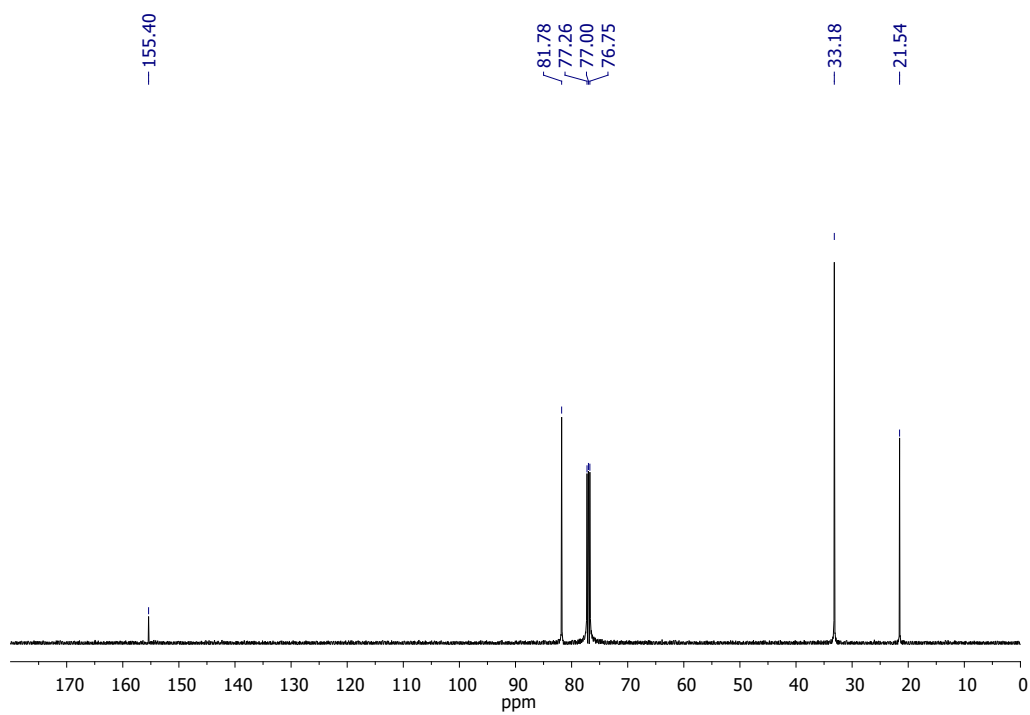

**Figure S18.** NMR Spectra for *trans*-1-phenyl-2-methylethylene carbonate **31c** in CDCl<sub>3</sub>

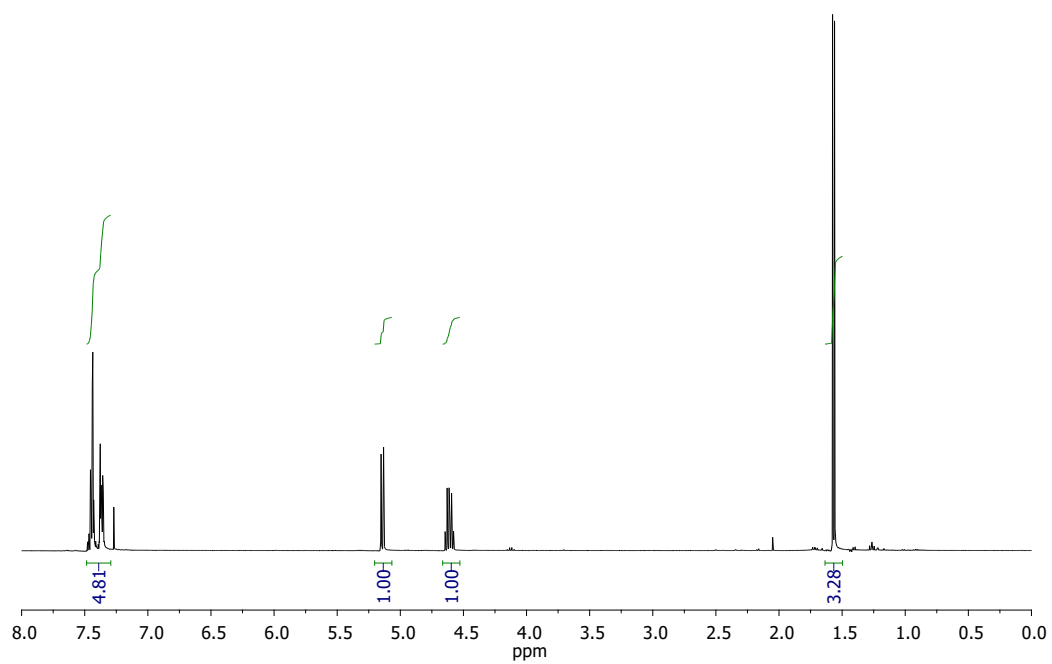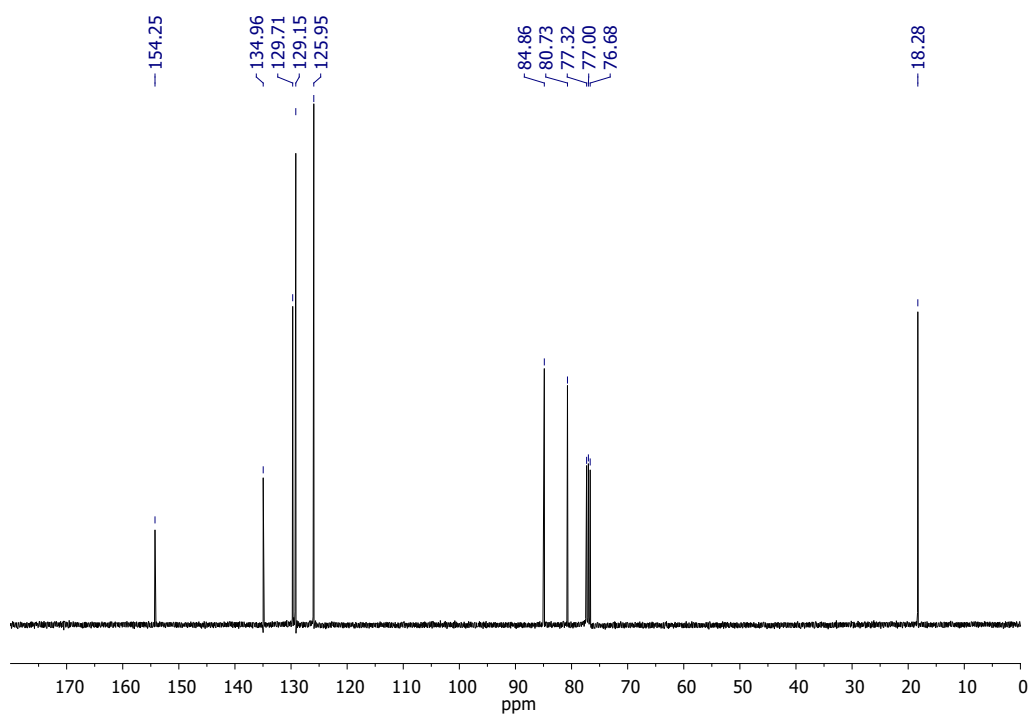

Figure S19. NMR Spectra for *trans*-1,2-diphenylethylene carbonate **31d** in CDCl<sub>3</sub>

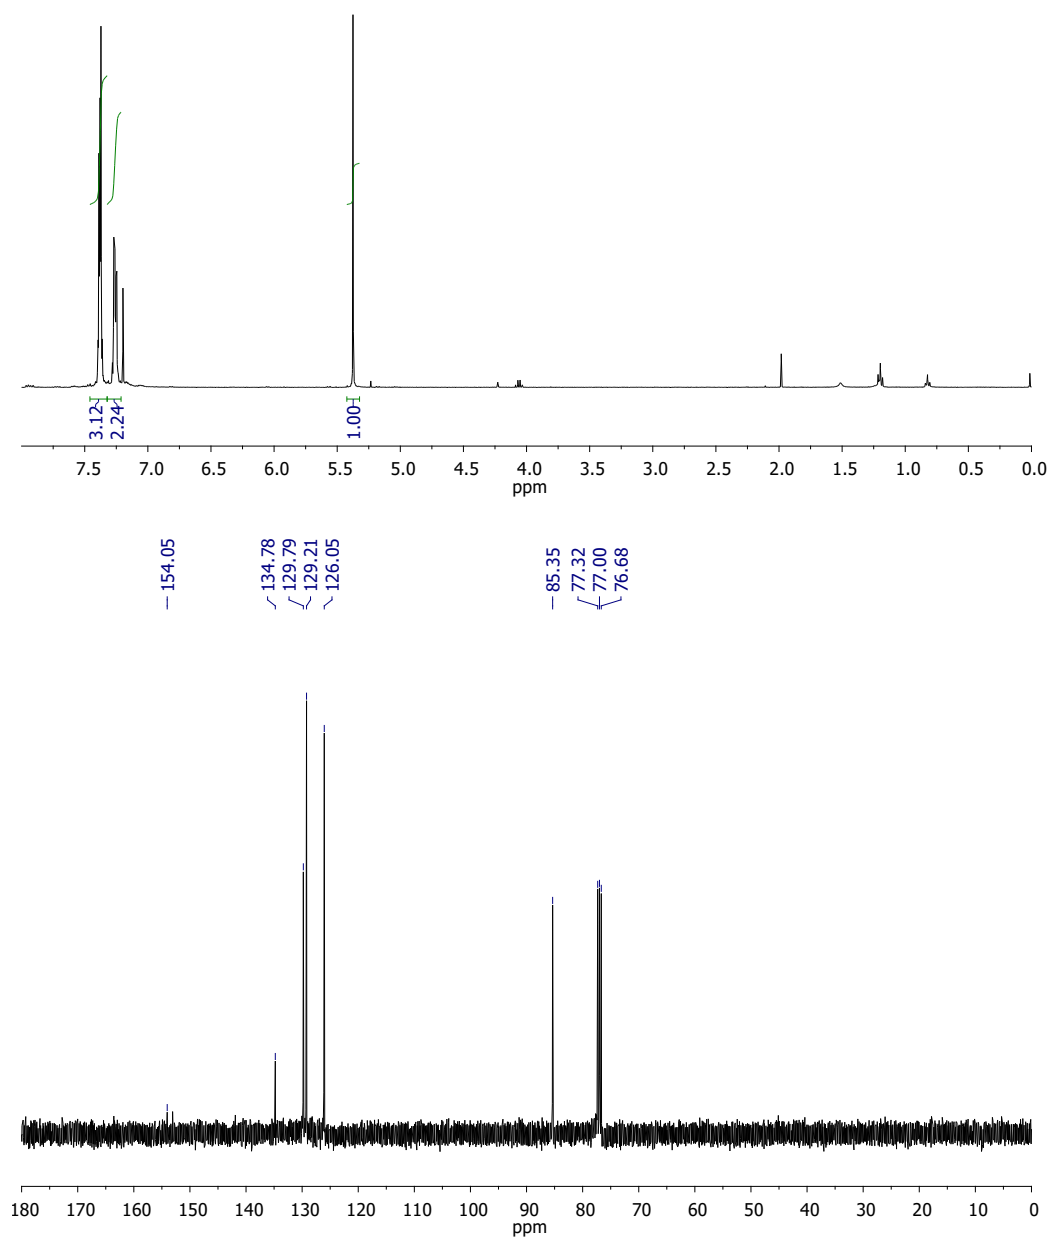



## References

(1) (a) Castro-Osma, J. A.; Alonso-Moreno, C.; Lara-Sánchez, A.; Martínez, J.; North, M.; Otero, A., *Catal. Sci. Technol.*, **2014**, *4*, 1674; (b) Martínez, J.; Castro-Osma, J. A.; Earlam, A.; Alonso-Moreno, C.; Otero, A.; Lara-Sánchez, A.; North, M.; Rodríguez-Diéguez, A., *Chem. Eur. J.*, **2015**, *21*, 9850; (c) Martínez, J.; Castro-Osma, J. A.; Alonso-Moreno, C.; Rodríguez-Diéguez, A.; North, M.; Otero, A.; Lara-Sánchez, A., *ChemSusChem*, **2017**, *10*, 1175; (d) Meléndez, D. O.; Lara-Sánchez, A.; Martínez, J.; Wu, X.; Otero, A.; Castro-Osma, J. A.; North, M.; Rojas, R. S., *ChemCatChem*, **2018**, *10*, 2271; (e) de La Cruz-Martínez, F.; Martínez, J.; Gaona, M. A.; Fernández-Baeza, J.; Sánchez-Barba, L. F.; Rodríguez, A. M.; Castro-Osma, J. A.; Otero, A.; Lara-Sánchez, A., *ACS Sustain. Chem. Eng.*, **2018**, *6*, 5322.
